# Supplementary material for: The complex relationships involved in global health: a qualitative description
Source: PubMed Central journal article supplement (PMC3819699; doi:10.1186/1472-6920-13-136), 2013-10-03
Supplement: 1472-6920-13-136-S1.pdf [file 1472-6920-13-136-S1.pdf]

Running title: Complex relationships in global health experiences

## Survey – Global Health Initiative – Professionals form

Thank you for agreeing to participate in the Global Health Initiative survey. The survey will consist of two sections.

Part One is a demographic and global health profile questionnaire that will attempt to capture your involvement in global health activities. By participating in this part of the interview, you allowing us to collect and post this information on-line, and to potentially act as a mentor in the global health community. With your permission, your answers will be used to construct your profile on our website. Consequently, none of the information obtained from this section will be anonymous.

Part Two is a needs' assessment in which we will focus on several key themes of global health and ask you to describe your own experiences. Your responses will be used to inform the development of a global health curriculum. In this section, I will be audio recording your answers. This part of the interview is a conversation-style answer and response. So at times, I may at ask you to further expand on your experiences. Please note, that this portion of the survey will be entirely anonymous, and remain separate from part one, above. The anonymous audio-recordings will be transcribed and only the transcriptions will be used for data analysis.

If you require any clarification of a question(s), please stop and ask prior to responding and I will better explain the question.

We will now begin.

### CONTACT INFORMATION

1. Name:
2. Job title:
3. Professional Affiliation(s):
4. Email:
5. Telephone (work):  
What is your preferred method of contact – email or phone

### PART ONE: PARTICIPANT'S DEMOGRAPHIC & GLOBAL HEALTH PROFILE

6. Education (please specify your degree(s) and name(s) of institution(s) where they were obtained):
  - MD: \_\_\_\_\_ Institution: \_\_\_\_\_
  - RN: \_\_\_\_\_ Institution: \_\_\_\_\_
  - MSc: \_\_\_\_\_ Institution: \_\_\_\_\_
  - PhD: \_\_\_\_\_ Institution: \_\_\_\_\_
  - Specialty &/or Subspecialty: \_\_\_\_\_ Institution: \_\_\_\_\_
  - Other – please specify: \_\_\_\_\_

Running title: Complex relationships in global health experiences

7. Are you affiliated with an NGO? YES NO  
If **YES**, please specify:

8. Do you have any affiliations with a group(s) related to Global/International Health –  
(including student organized or professional)  
YES NO

If **YES**, please specify:

9. Do you support/teach (please specify all that apply)
- a. medical students \_\_\_\_\_
  - b. nursing students \_\_\_\_\_
  - c. residents \_\_\_\_\_
  - d. graduate students \_\_\_\_\_
  - e. undergraduate health science students \_\_\_\_\_
  - f. other (please specify) \_\_\_\_\_

10. Area(s) of interest related to Global Health (please specify all that apply):

- basic science/laboratory: \_\_\_\_\_
- epidemiology: \_\_\_\_\_
- clinical practice: \_\_\_\_\_
- medical education: \_\_\_\_\_
- health policy: \_\_\_\_\_
- other: (please specify) \_\_\_\_\_

11. Have you ever lived, volunteered or worked in a resource poor country? (If YES please proceed to question 12, if NO, please proceed to question 13)  
YES NO

12. Please list each country, year, duration and a brief description of each experience which can be describe as either clinical or non-clinical areas.

|                                                                                                                |                                                                                                                                                 |
|----------------------------------------------------------------------------------------------------------------|-------------------------------------------------------------------------------------------------------------------------------------------------|
| COUNTRY: _____ YEAR: _____ DURATION: _____                                                                     |                                                                                                                                                 |
| <b>CLINICAL AREA(S)</b>                                                                                        | <b>NON-CLINICAL AREA(S)</b>                                                                                                                     |
| _____                                                                                                          | _____                                                                                                                                           |
| _____                                                                                                          | _____                                                                                                                                           |
| _____                                                                                                          | _____                                                                                                                                           |
| (If prompted to define clinical areas: <b>PROMPT</b><br>"A clinical area is, for example,")<br>HIV/AIDS: _____ | (If prompted to define non-clinical areas:<br><b>PROMPT</b> "A non-clinical area is, for example,")<br>Basic science/Laboratory research: _____ |

Running title: Complex relationships in global health experiences

|                                                                  |                                                                            |
|------------------------------------------------------------------|----------------------------------------------------------------------------|
| Obstetrics/Gynecology: ____<br>Pediatrics: ____<br>Surgery: ____ | Health Policy: ____<br>Medical Education: ____<br>Project management: ____ |
|------------------------------------------------------------------|----------------------------------------------------------------------------|

|                                                                                                                                                                                |                                                                                                                                                                                                                           |
|--------------------------------------------------------------------------------------------------------------------------------------------------------------------------------|---------------------------------------------------------------------------------------------------------------------------------------------------------------------------------------------------------------------------|
| <b>COUNTRY:</b> _____ <b>YEAR:</b> _____ <b>DURATION:</b> _____                                                                                                                |                                                                                                                                                                                                                           |
| <b>CLINICAL AREA(S)</b>                                                                                                                                                        | <b>NON-CLINICAL AREA(S)</b>                                                                                                                                                                                               |
| _____<br>_____<br>_____<br>_____                                                                                                                                               | _____<br>_____<br>_____<br>_____                                                                                                                                                                                          |
| (If prompted to define clinical areas: <b>PROMPT</b> "A clinical area is, for example,")<br>HIV/AIDS: ____<br>Obstetrics/Gynecology: ____<br>Pediatrics: ____<br>Surgery: ____ | (If prompted to define non-clinical areas: <b>PROMPT</b> "A non-clinical area is, for example,")<br>Basic science/Laboratory research: ____<br>Health Policy: ____<br>Medical Education: ____<br>Project management: ____ |

|                                                                                                                                                                                |                                                                                                                                                                                                                           |
|--------------------------------------------------------------------------------------------------------------------------------------------------------------------------------|---------------------------------------------------------------------------------------------------------------------------------------------------------------------------------------------------------------------------|
| <b>COUNTRY:</b> _____ <b>YEAR:</b> _____ <b>DURATION:</b> _____                                                                                                                |                                                                                                                                                                                                                           |
| <b>CLINICAL AREA(S)</b>                                                                                                                                                        | <b>NON-CLINICAL AREA(S)</b>                                                                                                                                                                                               |
| _____<br>_____<br>_____<br>_____                                                                                                                                               | _____<br>_____<br>_____<br>_____                                                                                                                                                                                          |
| (If prompted to define clinical areas: <b>PROMPT</b> "A clinical area is, for example,")<br>HIV/AIDS: ____<br>Obstetrics/Gynecology: ____<br>Pediatrics: ____<br>Surgery: ____ | (If prompted to define non-clinical areas: <b>PROMPT</b> "A non-clinical area is, for example,")<br>Basic science/Laboratory research: ____<br>Health Policy: ____<br>Medical Education: ____<br>Project management: ____ |

|                                                                 |                             |
|-----------------------------------------------------------------|-----------------------------|
| <b>COUNTRY:</b> _____ <b>YEAR:</b> _____ <b>DURATION:</b> _____ |                             |
| <b>CLINICAL AREA(S)</b>                                         | <b>NON-CLINICAL AREA(S)</b> |
| _____                                                           | _____                       |

Running title: Complex relationships in global health experiences

|                                                                                                                                                                                                                                           |                                                                                                                                                                                                                                                                                      |
|-------------------------------------------------------------------------------------------------------------------------------------------------------------------------------------------------------------------------------------------|--------------------------------------------------------------------------------------------------------------------------------------------------------------------------------------------------------------------------------------------------------------------------------------|
|                                                                                                                                                                                                                                           |                                                                                                                                                                                                                                                                                      |
|                                                                                                                                                                                                                                           |                                                                                                                                                                                                                                                                                      |
|                                                                                                                                                                                                                                           |                                                                                                                                                                                                                                                                                      |
| <p>(If prompted to define clinical areas: <b>PROMPT</b><br/> <i>"A clinical area is, for example,"</i>)<br/>         HIV/AIDS: ____<br/>         Obstetrics/Gynecology: ____<br/>         Pediatrics: ____<br/>         Surgery: ____</p> | <p>(If prompted to define non-clinical areas:<br/> <b>PROMPT</b> <i>"A non-clinical area is, for example,"</i>)<br/>         Basic science/Laboratory research: ____<br/>         Health Policy: ____<br/>         Medical Education: ____<br/>         Project management: ____</p> |

13. Are you currently involved in any global health activities? (If YES please specify, If NO then proceed to question 14)

YES NO

---



---



---



---

14. Are you seeking any help in your current or future global health activities?

YES NO

If YES, from whom you would like help and in what capacity:

|                                                         |       |        |
|---------------------------------------------------------|-------|--------|
| STUDENTS (please specify)                               |       |        |
| Pre-clinical                                            | Local | Global |
| Clinical                                                | Local | Global |
|                                                         |       |        |
| POSTGRAD                                                | Local | Global |
|                                                         |       |        |
| FACULTY                                                 | Local | Global |
| (If applicable, please specify preference of specialty) |       |        |

15. In what ways are you willing to be a resource for the global health activities of others?

- a. Mentor for (please specify all that apply): STUDENTS RESIDENTS FACULTY
- b. Educational presentations/teaching - specific topic(s) of interest:

Running title: Complex relationships in global health experiences

c. Supervisor, for example; field work activity or research (please specify):

\_\_\_\_\_

d. Other (please specify): \_\_\_\_\_

16. Can you recommend others we might contact as we build a global health database?

This now concludes the demographic and Global Health profile section of the survey. I would like to thank you for your willingness to participate. Your responses will be transcribed and formatted for online use. Prior to any of this information being displayed online, you will be sent an exact copy which will allow you the opportunity to verify its accuracy and make any corrections &/or modifications.

Running title: Complex relationships in global health experiences

## **PART TWO: NEEDS ASSESSMENT**

We will now commence the needs' assessment portion of the survey. I remind you that this section is entirely anonymous and your responses will be audio-recorded and transcribed.

I encourage you throughout this section to please describe in your own words, the experiences that you think are most relevant. Do you have any questions before we begin?

1. Please describe the most significant challenges/barriers you have encountered in your Global Health work.
  - a) Related to the example(s) above, can you please describe how these issues were coped with or resolved?
  - b) Are there any other significant challenges that you would like to discuss that we have not covered?
2. Please describe some noteworthy successes you experienced during your global health work that were not included in question #1.
3. Please describe any resources that you found most beneficial during your Global health project(s). This may be prior to your departure, when you were abroad and/or when you returned home. (If asked for clarification of the term "resources"; PROMPT: "*for example, resources might include courses, funding, contacts, debriefing opportunities*")
  - a) Follow up question: Can you think of resources that you wish you had had available?
4. Why do you go abroad, and what drives you to continue your work?
5. Have your experiences impacted your practice and/or life? Please expand.
6. Are there any topics or themes that you believe to be essential in the field of global health such that they should be taught to all medical students regardless of whether they will have future involvement in the field? If so, please specify. These topics or themes may be presented in the context of PBLs, a mandatory course or general inclusion throughout the curriculum.

Running title: Complex relationships in global health experiences

7. Another topic we're interested in exploring is your experiences of interprofessional collaboration in your Global Health activities. And we understand that the idea of 'interprofessional' may be very different for in your global health work than in your Canadian practices. Could comment on your experiences of collaborating with other healthcare professionals in global health settings? Maybe compare these to your experiences here in Canada?
  
8. Please tell me about the perceptions of the impacts your GH work had on individuals and/or communities in the host country. These perceptions can be your own or those from people of the host country.

b) What does medical tourism mean to you? Have you encountered it?

9. We have had a chance to talk about some of the aspects of your global health activities. There may be issues that haven't been addressed yet, can you describe to me any other issues and themes that you would like to address.
  
10. Please describe any advantages or disadvantages that you could foresee in establishing a network of information sharing & resource pooling amongst Global Health contributors through the Global Health Initiative?

This concludes the needs' assessment portion of our survey. I would like to thank you very much for taking the time to aid us in building a stronger Global Health community. Your time is greatly appreciated.
